# Supplementary material for: Integration of Chemoinformatics and Multi-Omics Analysis Defines ECT2 as a Potential Target for Cancer Drug Therapy
Source: MDPI journal article supplement (doi:10.3390/biology12040613), 2023-04-18
Supplement: s1 [file s1]

# Integration of Chemoinformatics and Multi-Omics Analysis Defines ECT2 as a Potential Target for Cancer Drug Therapy

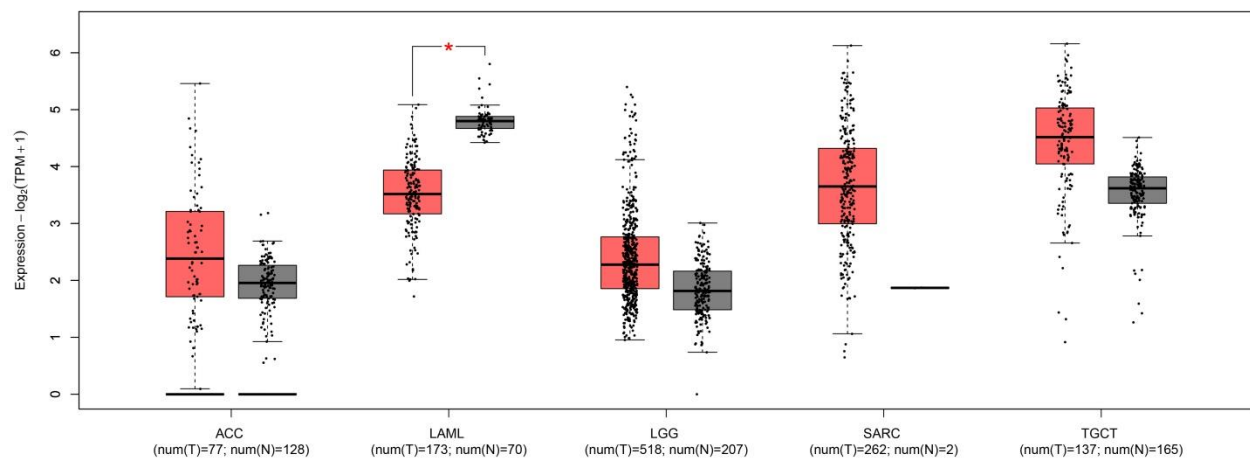

**Supplementary Figure S1.** Tumors that showed a non-significant difference or elevated ECT2 expression levels in normal tissue versus the cancerous one through analysis on the GEPIA2 database.

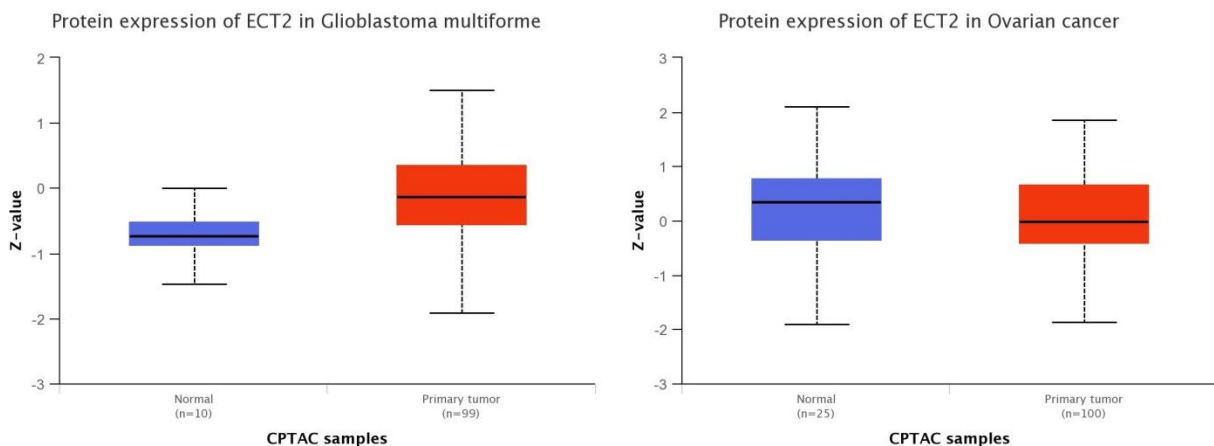

**Supplementary Figure S2.** Tumors that experienced a non-significant difference in ECT2 protein level in cancerous tissues and normal ones.



---

|      |                                       |
|------|---------------------------------------|
| ESCA | Esophageal carcinoma                  |
| GBM  | Glioblastoma multiforme               |
| HNSC | Head and Neck squamous cell carcinoma |
| KICH | Kidney Chromophobe                    |
| KIRC | Kidney renal clear cell carcinoma     |
| KIRP | Kidney renal papillary cell carcinoma |
| LAML | Acute Myeloid Leukemia                |
| LGG  | Brain Lower Grade Glioma              |
| LIHC | Liver hepatocellular carcinoma        |
| LUAD | Lung adenocarcinoma                   |
| LUSC | Lung squamous cell carcinoma          |
| MESO | Mesothelioma                          |
| OV   | Ovarian serous cystadenocarcinoma     |
| PAAD | Pancreatic adenocarcinoma             |
| PCPG | Pheochromocytoma and Paraganglioma    |
| PRAD | Prostate adenocarcinoma               |
| READ | Rectum adenocarcinoma                 |
| SARC | Sarcoma                               |
| SKCM | Skin Cutaneous Melanoma               |
| STAD | Stomach adenocarcinoma                |
| TGCT | Testicular Germ Cell Tumors           |
| THCA | Thyroid carcinoma                     |
| THYM | Thymoma                               |
| UCEC | Uterine Corpus Endometrial Carcinoma  |
| UCS  | Uterine Carcinosarcoma                |
| UVM  | Uveal Melanoma                        |

---
